# Supplementary material for: Metallic CoNi nanoparticles anchored on heteroatom-doped carbon/MnO nanowires for improved catalytic performance
Source: Royal Society of Chemistry journal article supplement (doi:10.1039/d3ce00437f), 2023-01-01
Supplement: d3ce00437f1.pdf [file d3ce00437f1.pdf]

# Metallic CoNi nanoparticles anchored on heteroatoms-doped Carbon/MnO nanowires for improved catalytic performance

Songbo Xie<sup>a</sup>, Xiaoying He<sup>a</sup>, Jingli Xu<sup>a</sup>, Xue-Bo Yin<sup>a</sup>, Min Zhang<sup>\*a</sup>

<sup>a</sup> College of Chemistry and Chemical Engineering, Shanghai University of Engineering Science, Shanghai 201620, China.

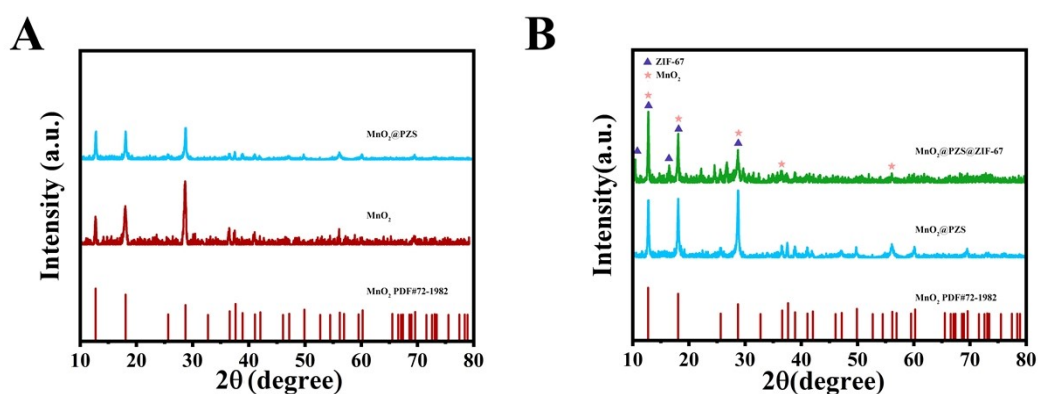

Fig. S1 (A) XRD patterns of MnO<sub>2</sub> and MnO<sub>2</sub>@PZS, (B) XRD patterns of MnO<sub>2</sub>@PZS and MnO<sub>2</sub>@PZS@ZIF-67.

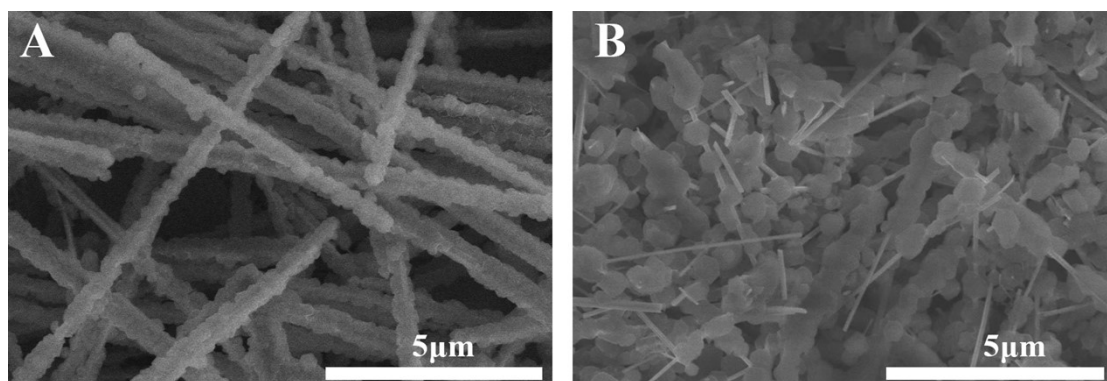

Fig. S2 SEM images of MnO<sub>2</sub>@PZS@ZIF-67 (A) and MnO<sub>2</sub>@ZIF-67 (B).
